# Supplementary material
Source: publisher figshare collection journal article supplement (https://gsajournals.figshare.com/articles/dataset/_/10058657)
Supplement: Supplementary file 1 [file 1]

## Supplemental Figures

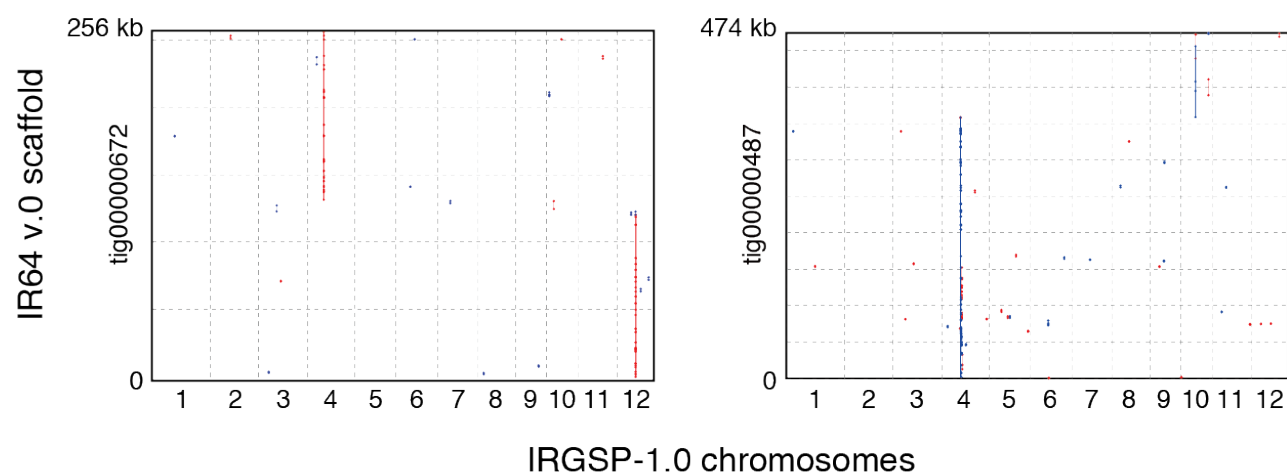

**Figure S1.** Genome alignment between IRGSP-1.0 genome and IR64 scaffolds. Red and blue dots represent forward and reverse alignments, respectively.

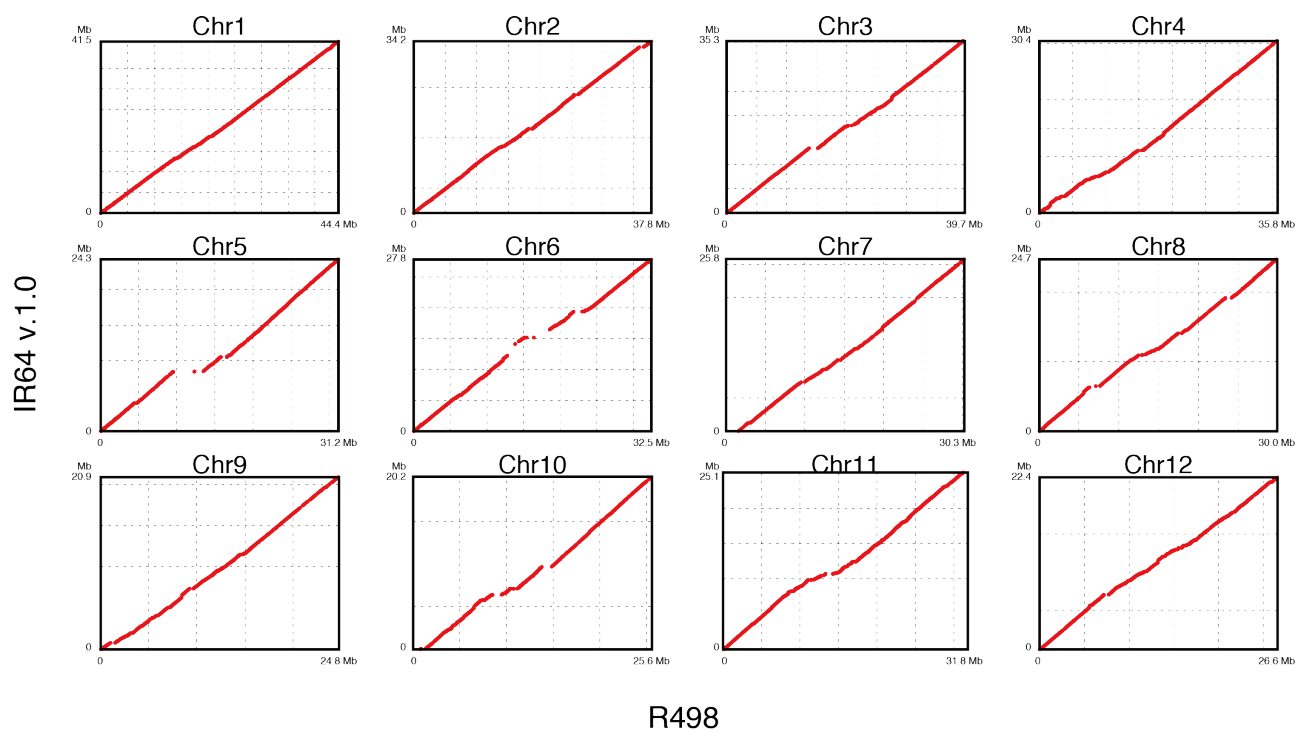

**Figure S2.** Chromosome alignments between R498 and IR64 v.1.0.

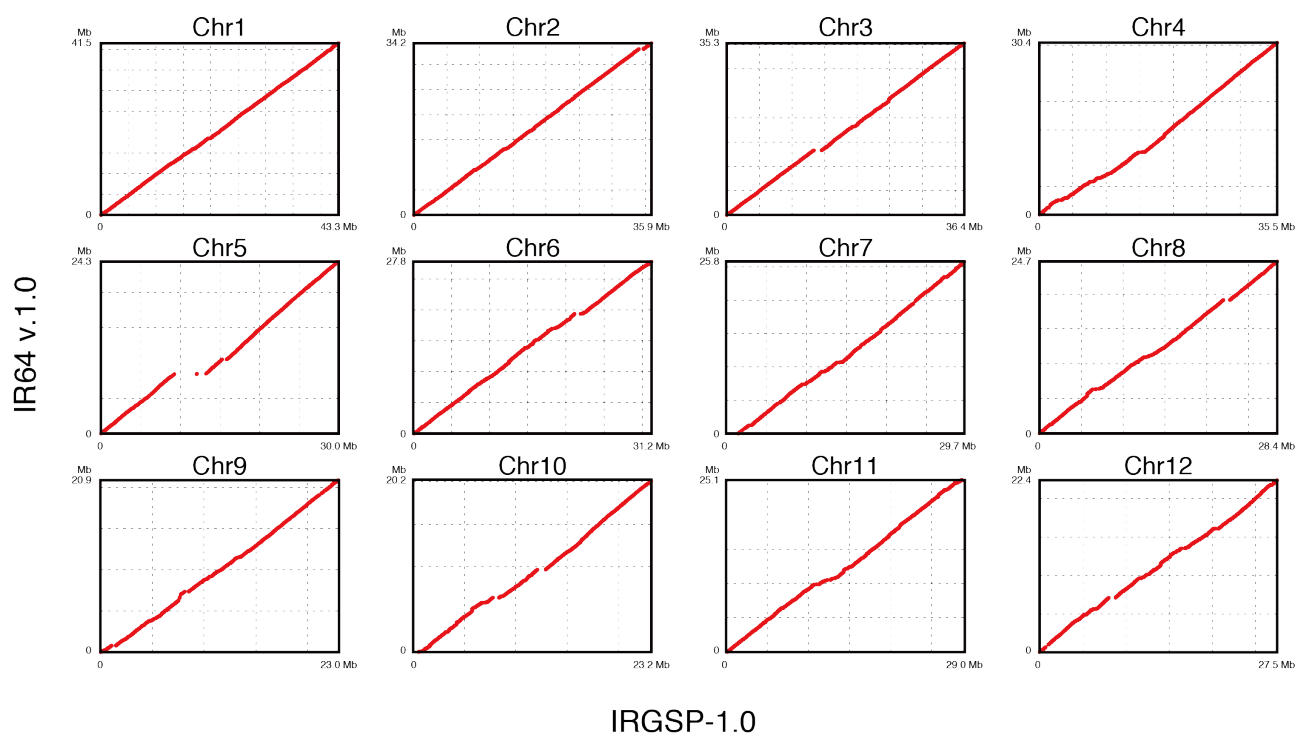

**Figure S3.** Chromosome alignments between IRGSP-1.0 and IR64 v.1.0.

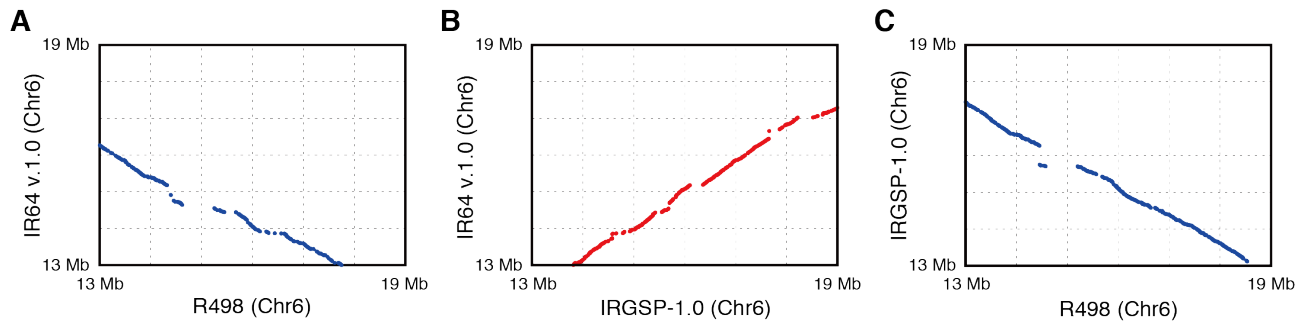

**Figure S4.** Chromosome alignments of chromosome 6 from 13 Mbp to 19 Mbp.

A) R498 versus IR64 v.1.0, B) IRGSP-1.0 versus IR64 v.1.0 and C) R498 versus IRGSP-1.0.

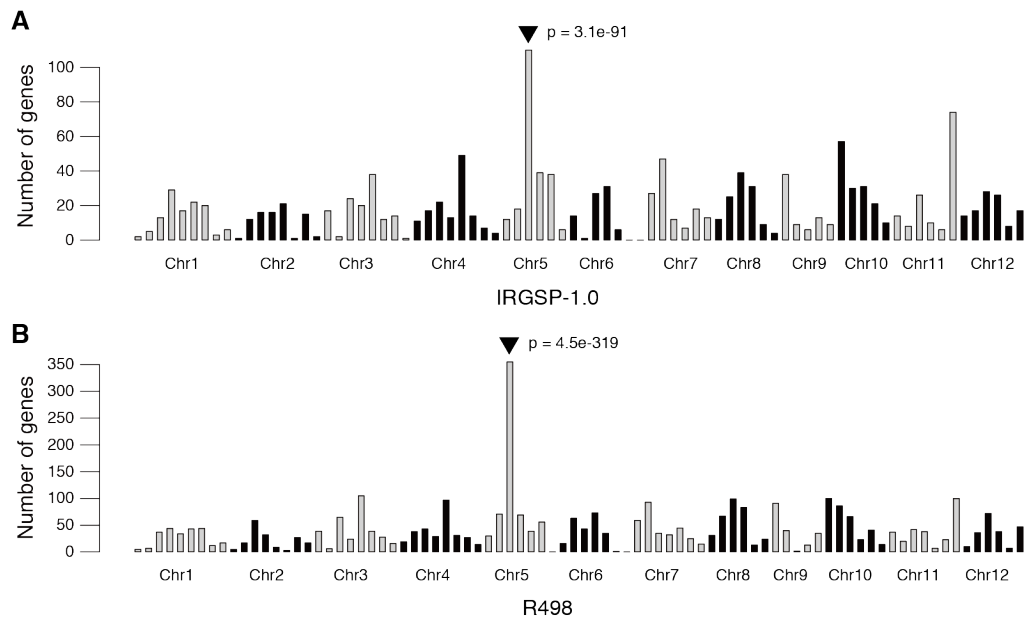

**Figure S5.** Chromosomal distribution of genes mapped on IR64 v.1.0 unanchored sequences. A) IRGSP-1.0, B) R498. Arrowheads indicate locations of the alignment gaps in chromosome 5. Enrichment test results (one-tailed p-values) are indicated.

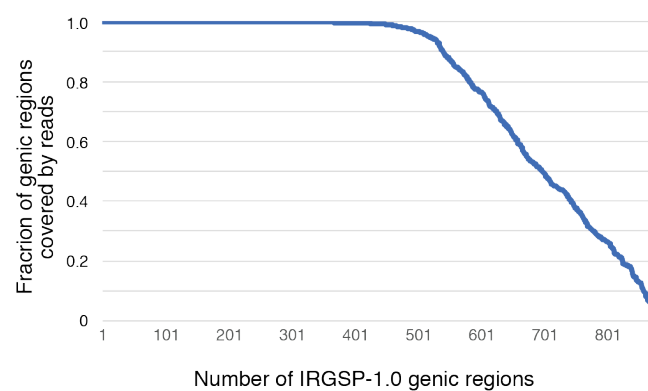

**Figure S6.** Fraction of missing genic regions in IR64 covered by paired-end reads obtained from linked-read sequencing of IR64 genome.

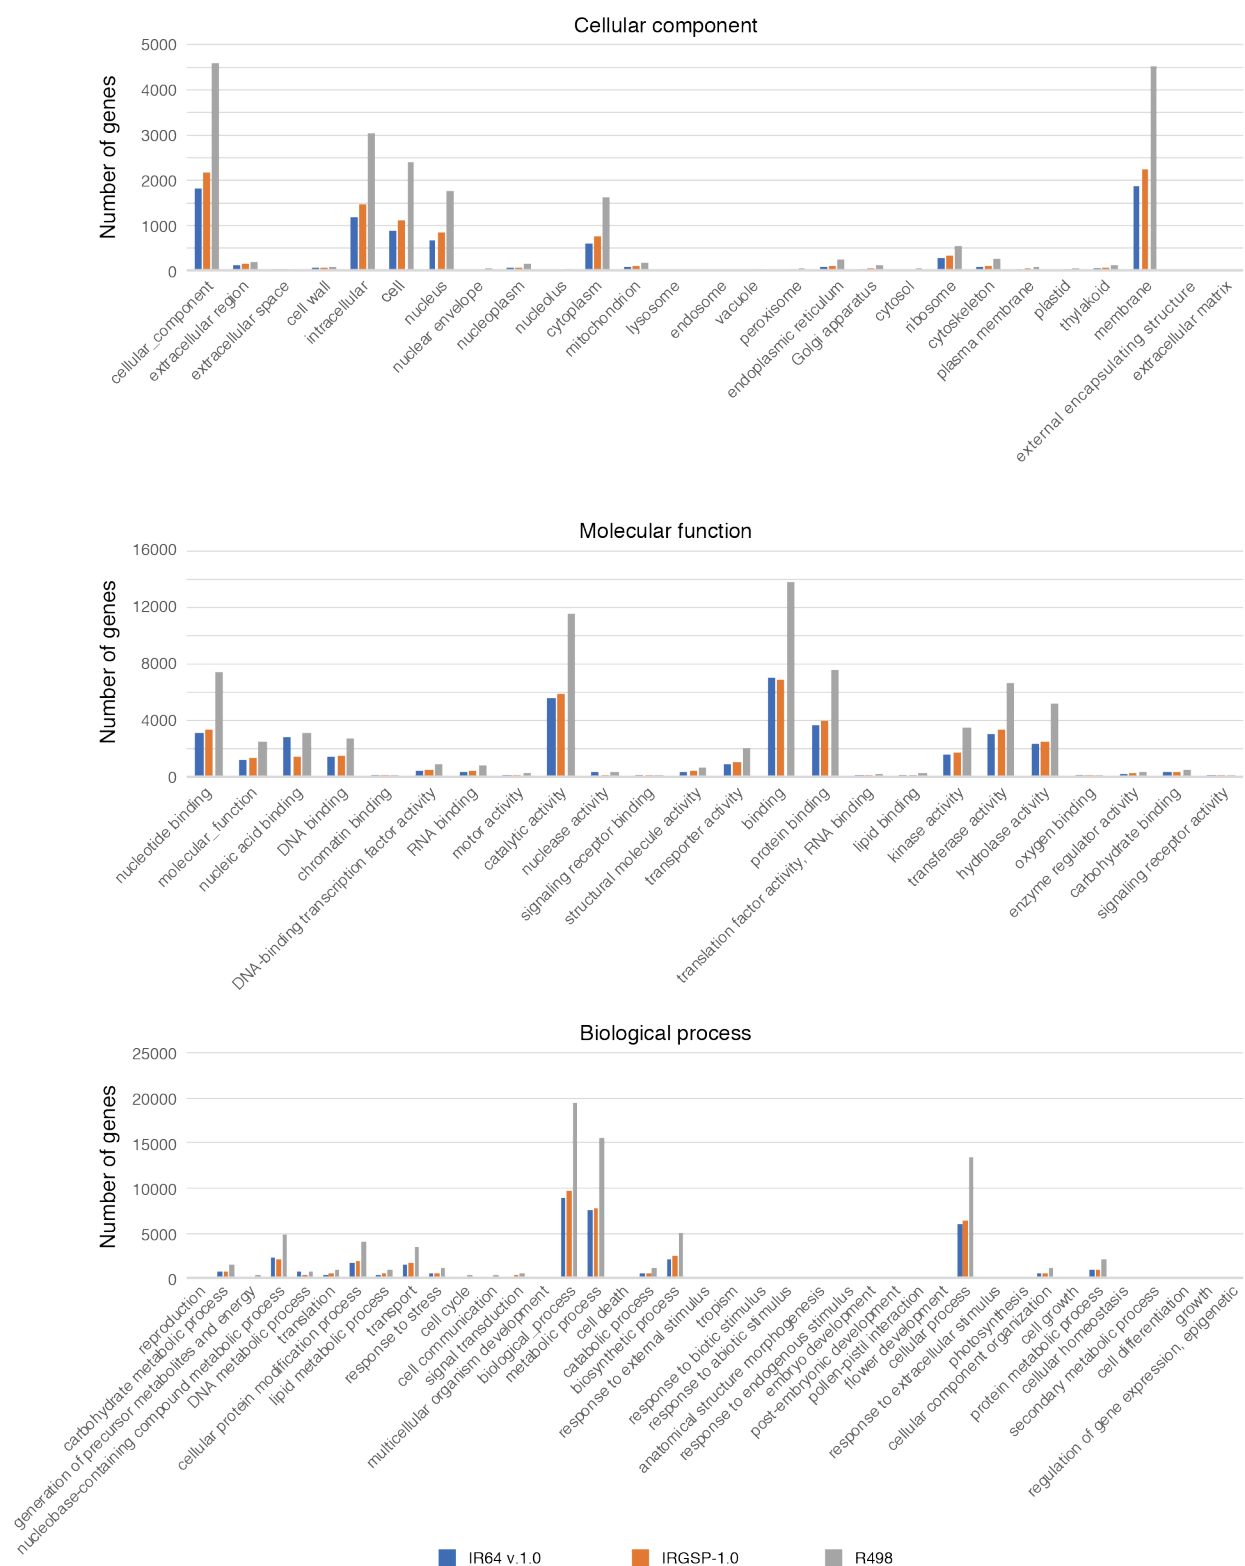

**Figure S7.** Distribution of gene ontologies.
